# Supplementary material
Source: PubMed Central journal article supplement (PMC5820948)
Supplement: IAI.00559-17_zii999092297s1.pdf [file IAI.00559-17_zii999092297s1.pdf]

Table S1. Protein identities of the five immunogenic antigens in representative serotypes of disease-associated *S. suis* strains with complete genomes in GenBank<sup>a</sup>

| Disease-associated <i>S. suis</i> serotypes |          |                  |             |       | Five immunogenic antigens |         |         |         |         |
|---------------------------------------------|----------|------------------|-------------|-------|---------------------------|---------|---------|---------|---------|
| Strain                                      | Serotype | Source           | Country     | Host  | SSU0185                   | SSU1215 | SSU1355 | SSU1773 | SSU1915 |
| SS12                                        | 1/2      | Respiratory      | China       | pig   | 100%                      | 100%    | 100%    | 100%    | 100%    |
| ST1                                         | 1        | unknown          | China       | pig   | 99%                       | 98%     | 98%     | 97%     | 100%    |
| S735                                        | 2        | Respiratory      | Netherlands | Pig   | 99%                       | 100%    | 100%    | 99%     | 100%    |
| P1/7                                        | 2        | Systemic (Brain) | UK          | pig   | 100%                      | 100%    | 100%    | 100%    | 100%    |
| A7                                          | 2        | Systemic (Brain) | China       | pig   | 100%                      | 100%    | 100%    | 100%    | 100%    |
| 89/1591 <sup>b</sup>                        | 2        | Systemic (other) | Canada      | pig   | 98%                       | 99%     | 99%     | 98%     | 100%    |
| BM407                                       | 2        | Systemic (Brain) | Vietnam     | Human | 100%                      | 100%    | 100%    | 100%    | 100%    |
| SC84                                        | 2        | Systemic (Brain) | China       | Human | 100%                      | 100%    | 100%    | 100%    | 100%    |
| 98HAH33                                     | 2        | Systemic (Brain) | China       | Human | 100%                      | 100%    | 100%    | 99%     | 100%    |
| 05ZYH33                                     | 2        | Systemic (Brain) | China       | Human | 95%                       | 98%     | 98%     | 99%     | 100%    |
| GZ1                                         | 2        | Systemic (other) | China       | Human | 97%                       | 100%    | 100%    | 100%    | 100%    |
| ST3                                         | 3        | Respiratory      | China       | pig   | 98%                       | 99%     | 99%     | 98%     | 100%    |
| 6407                                        | 4        | Systemic (other) | Denmark     | pig   | 99%                       | 99%     | 99%     | 98%     | 100%    |
| D9                                          | 7        | Systemic (other) | China       | pig   | 98%                       | 99%     | 99%     | 97%     | 100%    |
| D12                                         | 9        | Respiratory      | China       | pig   | 96%                       | 91%     | 91%     | 97%     | 97%     |
| JS14                                        | 14       | Systemic (other) | China       | pig   | 100%                      | 99%     | 99%     | 100%    | 100%    |

<sup>a</sup> *S. suis* strains for which a complete genome sequence is available in GenBank (15 isolates) and

<sup>b</sup> Strain 89-1591 a North American isolate 89/159 for which a draft genome is available in

GenBank are used in this analysis. These strains represent disease-associated *S. suis* serotypes isolated from various origins around the world. The protein identities of the five immunogenic polypeptides were identified in these strains by taking the protein sequences of P1/7 and using BlastP against the 16 genomes.
